# Supplementary material
Source: HighWire-hosted journal article supplement (https://erj.ersjournals.com/content/52/3/1702529)
Supplement: inline-supplementary-material-1 [file inline-supplementary-material-1.pdf]

## S1. Monitoring protocol after positive newborn screening for CF

| (months of age)                                     | 0 | 1 | 2  | 3  | 4 | 5 | 6 | 7 | 8 | 9 | 10 | 11 | 12 | 15 | 18 | 21 | 24 | 27 | 30 | 33 | 36 | 39 | 42 | 45 | 48 | 51 | 54 | 57 | 60 |
|-----------------------------------------------------|---|---|----|----|---|---|---|---|---|---|----|----|----|----|----|----|----|----|----|----|----|----|----|----|----|----|----|----|----|
| 1. Informed consent                                 | x |   |    |    |   |   |   |   |   |   |    |    |    |    |    |    |    |    |    |    |    |    |    |    |    |    |    |    |    |
| 2. Demographic History                              | x |   |    |    |   |   |   |   |   |   |    |    |    |    |    |    |    |    |    |    |    |    |    |    |    |    |    |    |    |
| 3. DNA                                              | x |   |    |    |   |   |   |   |   |   |    |    |    |    |    |    |    |    |    |    |    |    |    |    |    |    |    |    |    |
| 4. Sweattest                                        | x |   |    |    |   |   |   |   |   |   |    |    |    |    |    |    |    |    |    |    |    |    |    |    |    |    |    |    |    |
| 5. Out-patient clinic visits/contacts               | x | x | x  | x  | x | x | x |   | x |   | x  |    | x  | x  | x  | x  | x  | x  | x  | x  | x  | x  | x  | x  | x  | x  | x  | x  | x  |
| a. Pediatric pulmonologist/CF nurse                 | x | x | x  | x  | x | x | x |   | x |   | x  |    | x  | x  | x  | x  | x  | x  | x  | x  | x  | x  | x  | x  | x  | x  | x  | x  | x  |
| b. Gastro-enterologist/dietician                    |   | x | x° | x  |   |   | x |   |   |   | x° |    | x° |    |    |    | x° |    |    |    | x° |    |    |    | x° |    |    |    | x° |
| 6. Medical history/review symptoms                  | x | x | x  | x  | x | x | x |   | x |   | x  |    | x  | x  | x  | x  | x  | x  | x  | x  | x  | x  | x  | x  | x  | x  | x  | x  | x  |
| 7. Physical examination                             | x | x | x  | x  | x | x | x |   | x |   | x  |    | x  | x  | x  | x  | x  | x  | x  | x  | x  | x  | x  | x  | x  | x  | x  | x  | x  |
| 8. Length, weight, head circumference               | x | x | x  | x  | x | x | x |   | x |   | x  |    | x  | x  | x  | x  | x  | x  | x  | x  | x  | x  | x  | x  | x  | x  | x  | x  | x  |
| 9. Symptom diary                                    | x | x | x  | x  | x | x | x |   | x |   | x  |    | x  | x  | x  | x  | x  | x  | x  | x  | x  | x  | x  | x  | x  | x  | x  | x  | x  |
| 10. Throat swab/sputum culture, nasopharyngeal swab | x | x | x  | x  | x | x | x |   | x |   | x  |    | x  | x  | x  | x  | x  | x  | x  | x  | x  | x  | x  | x  | x  | x  | x  | x  | x  |
| 11. Faecal elastase                                 | x |   |    |    |   |   |   |   |   |   |    |    | x# |    |    |    | x# |    |    |    | x# |    |    |    | x# |    |    |    | x# |
| 12. Faecal fat balance                              |   |   |    |    |   |   |   |   |   |   |    |    |    |    |    |    |    |    |    |    |    |    |    |    | x  |    |    |    | x  |
| 13. Blood                                           |   |   |    | x  |   |   |   |   |   |   |    |    | x  |    |    |    | x  |    |    |    | x  |    |    |    | x  |    |    |    | x  |
| 14. Urine                                           |   |   |    | x* |   |   |   |   |   |   |    |    | x* |    |    |    |    |    |    |    |    |    |    |    |    |    |    |    |    |
| 15. Bronchoscopy and BAL                            |   |   |    |    |   |   |   |   |   |   |    |    | x  |    |    |    |    |    |    |    | x  |    |    |    |    |    |    |    | x  |
| 16. Chest X-ray                                     |   |   |    | x  |   |   |   |   |   |   |    |    |    |    |    |    | x  |    |    |    |    |    |    |    | x  |    |    |    |    |
| 17. Chest CT scan                                   |   |   |    |    |   |   |   |   |   |   |    |    | x  |    |    |    |    |    |    |    | x  |    |    |    |    |    |    |    | x  |
| 18. Infant lungfunction¥                            |   |   |    |    |   |   |   |   |   |   |    |    | x  |    |    |    |    |    |    |    |    |    |    |    |    |    |    |    |    |
| 19. Spirometry                                      |   |   |    |    |   |   |   |   |   |   |    |    |    |    |    |    |    |    |    |    |    |    |    |    | x  | x  | x  | x  | x  |
| 20. CFQ-R                                           |   |   |    |    |   |   |   |   |   |   |    |    |    |    |    |    |    |    |    |    |    |    |    |    |    |    |    |    | x  |
| 21. ICM                                             |   |   |    |    |   |   |   |   |   |   |    |    | x  |    |    |    |    |    |    |    |    |    |    |    |    |    |    |    | x^ |

\* for Na, creatinine

# only in pancreatic sufficient patients

° both GI specialist and dietician, other months only dietician

^ in case of rest activity measured at 12 months

¥ only applicable for Rotterdam patients
