# Supplementary material
Source: HighWire-hosted journal article supplement (https://erj.ersjournals.com/content/52/3/1702529)
Supplement: inline-supplementary-material-2 [file inline-supplementary-material-2.pdf]

## S2. CT procedures

All CTs of CF subjects were made supine, with pressure control under general anesthesia (for Utrecht patients) or with free-breathing (for Rotterdam patients). To reduce atelectasis in sedated patients, alveolar recruitment maneuvers were performed consisting of 10 consecutive slow breath with inspirations pressure of 40 cm H<sub>2</sub>O followed by a breath hold with end-inspiration pressure of 25 cm H<sub>2</sub>O. Volumetric end-inspiratory acquisitions were obtained using a Philips Brilliance 16p scanner in Utrecht and Siemens Definition Flash scanner in Rotterdam.

See also Kuo et al. Ped Pulmonol 2017

| CT setting                   | Rotterdam                | Utrecht                |
|------------------------------|--------------------------|------------------------|
| CT Scanner                   | Siemens Definition Flash | Philips Brilliance 16p |
| Scan type                    | Inspiratory              | Inspiratory            |
| Acquisition                  | Volumetric               | Helical                |
| Rotation time (ms)           | 280                      | 500                    |
| Pitch                        | 3                        | 0.9                    |
| Slice thickness (mm)         | 1.0                      | 1.0                    |
| Increment (mm)               | 0.7                      | 0.7                    |
| Collimation (mm)             | 0.63                     | 16x0.75                |
| Tube voltage (kVp)           | 100                      | 90                     |
| Current-time product (mAs)   | 10                       | 20                     |
| CTDIvol (mGy)                | 0.5                      | 0.7                    |
| Dose-Length Product (mGy cm) | 12.3                     | 12.1                   |

**Table S2.** CT settings. CTDIvol and Dose-Length Product based on a 32-cm phantom and reported as mean.
