# Supplementary material
Source: HighWire-hosted journal article supplement (https://erj.ersjournals.com/content/52/3/1702529)
Supplement: inline-supplementary-material-5 [file inline-supplementary-material-5.pdf]

S5. Overview of all chloride secretory responses as measured with ICM (in biopsies of 23 of 34 patients)

| Patient number | $\Delta I_{sc,carbachol}$<br>( $\mu A/cm^2$ ) | $\Delta I_{sc,cAMP/forskolin}$<br>( $\mu A/cm^2$ ) | $\Delta I_{sc,histaminel}$<br>( $\mu A/cm^2$ ) | $\Delta I_{sc,carb+cAMP/fors+hist}$<br>( $\mu A/cm^2$ ) |
|----------------|-----------------------------------------------|----------------------------------------------------|------------------------------------------------|---------------------------------------------------------|
| 1              | 0±0.6                                         | 0±0.7                                              | 3.1±0.3                                        | 3.1                                                     |
| 2              | 0±4.5                                         | 3.1±3                                              | 0±0.5                                          | 3.1                                                     |
| 3              | -                                             | -                                                  | -                                              | -                                                       |
| 4              | 22.1±10.4                                     | 11.3±5                                             | 19±5.6                                         | 52.4                                                    |
| 5              | 8.2±2.5                                       | 1.1±1.6                                            | 0.7±10.1                                       | 10                                                      |
| 6              | 0±2.4                                         | 3.3±0.7                                            | 3.3±0.3                                        | 6.6                                                     |
| 7              | 0±4.4                                         | 2.9±0.9                                            | 0±8.5                                          | 2.9                                                     |
| 8              | -                                             | -                                                  | -                                              | -                                                       |
| 9              | 0±4.0                                         | 1.7±2.1                                            | 2.2±1.0                                        | 3.9                                                     |
| 10             | -                                             | -                                                  | -                                              | -                                                       |
| 11             | 0±7.3                                         | 3.3±4.0                                            | 0±2.2                                          | 3.3                                                     |
| 12             | 11.5±4.5                                      | 11.3±11.1                                          | 10.2±6.3                                       | 33                                                      |
| 13             | 0±2.0                                         | 6.1±2.5                                            | 0±2.8                                          | 6.1                                                     |
| 14             | -                                             | -                                                  | -                                              | -                                                       |
| 15             | 0±9.0                                         | 2.9±2.9                                            | 2.7±1.2                                        | 5.6                                                     |
| 16             | -                                             | -                                                  | -                                              | -                                                       |
| 17             | 0±3.8                                         | 3.4±1.1                                            | 8.7±3.5                                        | 12.1                                                    |
| 18             | 0±1.1                                         | 1.8±1.4                                            | 6.8±2.2                                        | 8.6                                                     |
| 19             | -                                             | -                                                  | -                                              | -                                                       |
| 20             | -                                             | -                                                  | -                                              | -                                                       |
| 21             | -                                             | -                                                  | -                                              | -                                                       |
| 22             | 5.3±8.6                                       | 0±6.7                                              | 0±2.2                                          | 5.3                                                     |
| 23             | 0±9.6                                         | 3.9±0.8                                            | 0±5.5                                          | 3.9                                                     |
| 24             | -                                             | -                                                  | -                                              | -                                                       |
| 25             | 0±1.3                                         | 3.3±1.3                                            | 0.2±3.0                                        | 3.5                                                     |
| 26             | -                                             | -                                                  | -                                              | -                                                       |
| 27             | 0±5.6                                         | 14.2±3.8                                           | 0±5.8                                          | 14.2                                                    |
| 28             | -                                             | -                                                  | -                                              | -                                                       |
| 29             | 13.2±10.8                                     | 21.8±10.3                                          | 15.7±18.7                                      | 50.7                                                    |
| 30             | 2.3±1.5                                       | 23±4.3                                             | 5±0.4                                          | 30.3                                                    |
| 31             | 34.8±14.8                                     | 32.2±3.6                                           | 5.4±3.3                                        | 72.4                                                    |
| 32             | 0±7.6                                         | 9.5±4.4                                            | 6.4±3.8                                        | 15.9                                                    |
| 33             | 23±23.5                                       | 17.3±13.5                                          | 11.5±6.1                                       | 51.8                                                    |
| 34             | 15.1±15.8                                     | 29.9±15.5                                          | 0±7.4                                          | 45                                                      |

ICM: intestinal current measurement. I<sub>sc</sub>: short-circuit current. Negative currents (reflecting apical K<sup>+</sup> secretion) are set to 0. Mean ± SD are given. Hyphens indicate that ICM values are not determined.
