# Supplementary material
Source: HighWire-hosted journal article supplement (https://erj.ersjournals.com/content/52/3/1702529)

## S6. ICM tracings

ICM tracings of CF infants (number 4 and 12) with relatively high responses to secretagogues, as compared with the typical ICM tracings of a homozygous F508del patient (infant 7).

- Original LabChart tracings of infant 4 (F508del/F508del)

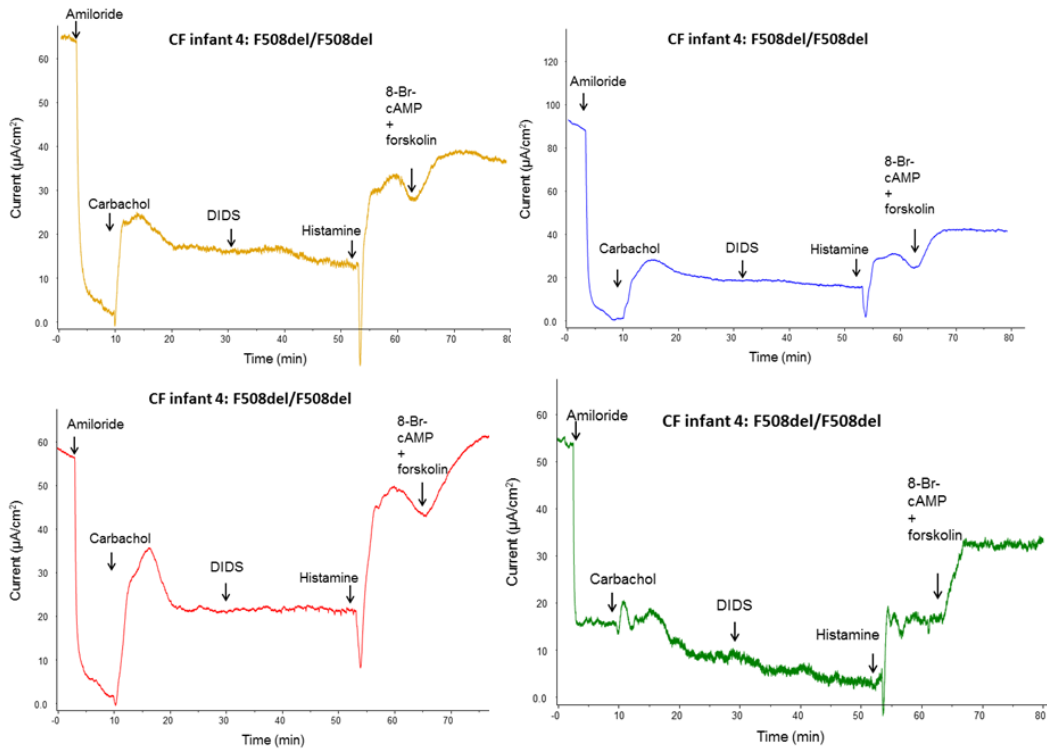

- Original LabChart tracings of infant 12 (F508del/L927P)

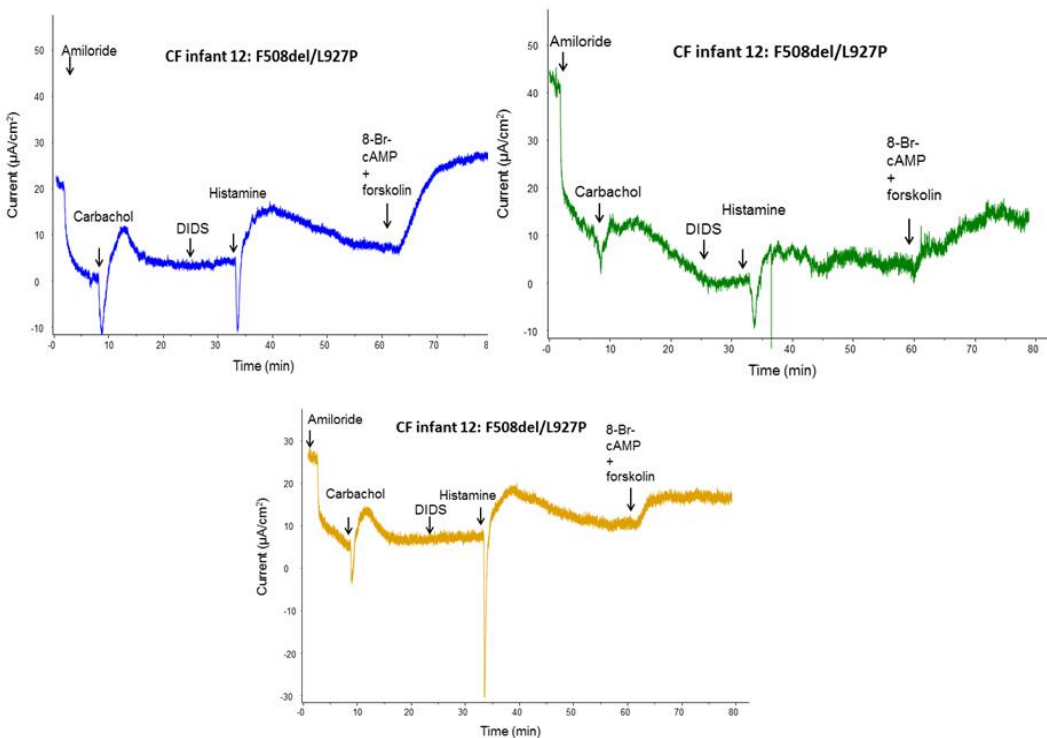

- Original LabChart tracings of infant 7 (F508del/F508del)

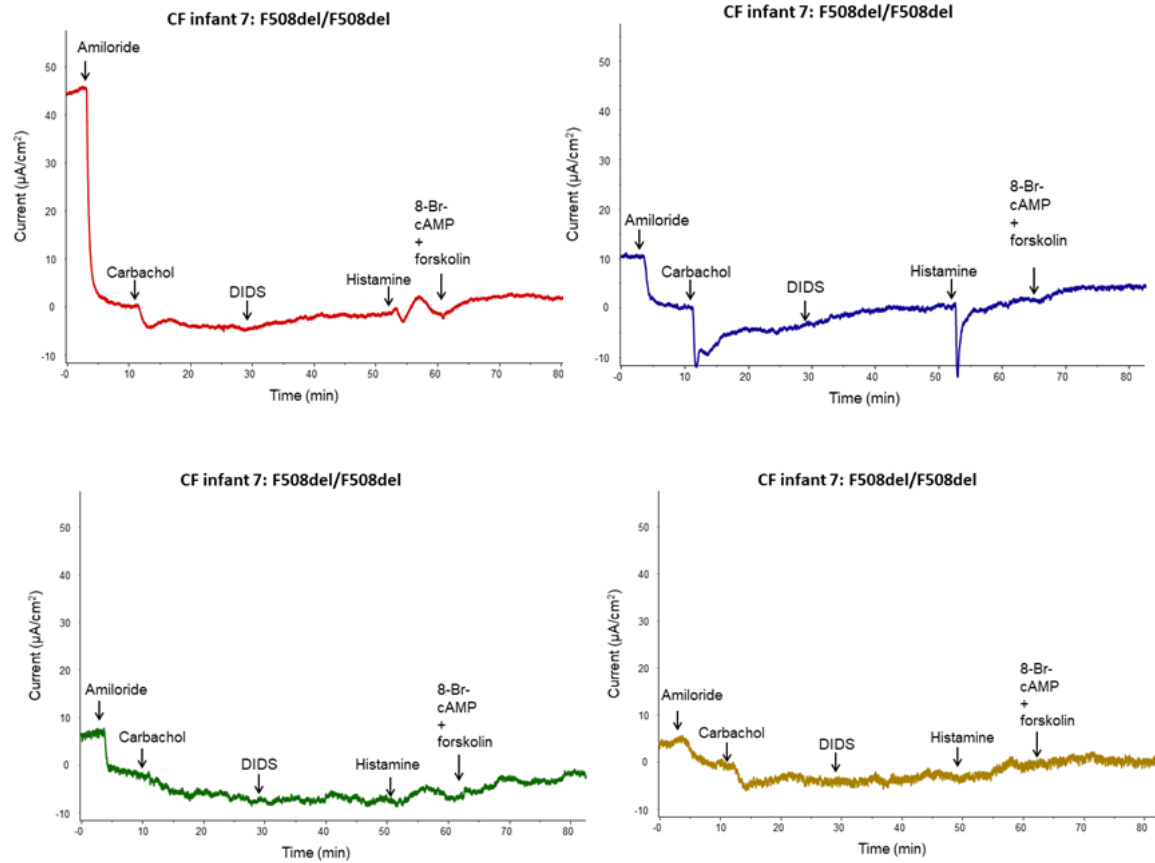

Supplement: inline-supplementary-material-6 [file inline-supplementary-material-6.pdf]
